# Supplementary material for: Distrust As a Disease Avoidance Strategy: Individual Differences in Disgust Sensitivity Regulate Generalized Social Trust
Source: PubMed Central journal article supplement (PMC4963405; doi:10.3389/fpsyg.2016.01038), 2016-07-28
Supplement: Presentation1.pdf [file Presentation1.pdf]

1 Supplemental Online Information for

2  
3 “Distrust as a Disease Avoidance Strategy: Individual Differences in Disgust  
4 Sensitivity Regulate Generalized Social Trust”

5 Table of Contents

6 A1. Supplemental measurement details for Study 1 ..... 1  
7 A2. Bivariate correlations between pathogen disgust sensitivity and trust  
8 measures in Studies 1-3 ..... 3  
9 A3. Supplemental measurement details for Study 2 ..... 3  
10 A4. Supplemental analysis for Study 2 ..... 5  
11 A4.1 Interaction analysis for Study 2 ..... 5  
12 A4.2 Regression models for Figure 2 in the main text..... 6  
13 A5. Supplemental measurement details for Study 3 ..... 7  
14 A6. References ..... 11  
15

16  
17 A1. Supplemental measurement details for Study 1

18 **Education.** To measure education, we asked respondents to indicate their last level of  
19 completed schooling. They were offered the following response categories:

20 “Less than high school graduate“, “High school graduate”, “Some college”,  
21 “Currently a college student”, “College graduate”, “Post college degree”.

22 For the analysis, the categories “Some college” and “Currently a college  
23 student” were collapsed, and the variable was re-scaled to range from 0 to 1, with  
24 higher values indicating higher levels of completed schooling (0 = “Less than high  
25 school graduate”, 0.25 = “High school graduate”, 0.50 = “Some college”/“Currently a  
26 college student”, 0.75 = “College graduate”, 1 = “Post college degree”).

27 **Income.** As our measure of income we rely on family income. Specifically,  
28 the respondents were asked to indicate the income category that corresponded to their

29 family's situation. The following response categories were offered: "Under \$15,000",  
30 "Between \$15,000 and \$24,999", "Between \$25,000 and \$34,999", "Between  
31 \$35,000 and \$49,999", "Between \$50,000 and \$64,999", "Between \$65,000 and  
32 \$79,999", "Between \$80,000 and \$99,999", "Between \$100,000 and \$149,999",  
33 "Between \$150,000 and \$199,999", "Over \$200,000".

34 For the analysis, the variable was re-scaled to range from 0 to 1, with higher  
35 values indicating a higher level of income.

36 **Race.** To measure race, subjects were asked the following question: "What  
37 general racial or ethnic category do you consider yourself..." The following response  
38 categories were presented: "Black", "Caucasian", "Latino/a or "Hispanic", "Asian",  
39 "Native American," and "Other". For analysis, the variable was coded as a  
40 dichotomous measure with 1 = Caucasian and 0 = racial/ethnic minority groups  
41 (including "Black", "Latino/a or "Hispanic", "Asian", "Native American," and  
42 "Other").

43 **Gender.** In the analysis, gender was coded as the dichotomous variable  
44 "female" with 1 = female and 0 = male.

45

46

47

48

49

50

51 **A2. Bivariate correlations between pathogen disgust sensitivity and trust**  
 52 **measures in Studies 1-3**

53 Table A1 below provides the bivariate correlation between pathogen disgust  
 54 sensitivity and social trust by study, trust measure, and - in Study 2 -  
 55 experimental condition.

56 **Table A1: Bivariate correlations between pathogen disgust sensitivity and**  
 57 **social trust**

|                                                 | Study 1 | Study 2                 |                                       | Study 3 |
|-------------------------------------------------|---------|-------------------------|---------------------------------------|---------|
|                                                 |         | “most people” condition | “people in my neighborhood” condition |         |
| Single item measure of generalized social trust | -.11*   | -.20***                 | -.14***                               | -.19*** |
| Yamagishi & Yamagishi general trust scale       |         | -.15***                 | -.09*                                 |         |
| Combined trust measure                          |         | -.20***                 | -.13***                               |         |

58 *Note.* Entries are bivariate Pearson’s coefficients. \*  $p < 0.05$ , \*\*  $p < 0.01$ , \*\*\*  $p <$   
 59  $0.001$ .

60

61 **A3. Supplemental measurement details for Study 2**

62 **Table A2: Descriptive statistics on the respondents’ trust in nine groups**

| Item                                 | Mean | Standard deviation | Minimum | Maximum | n    |
|--------------------------------------|------|--------------------|---------|---------|------|
| “Your family”                        | 0.87 | 0.21               | 0       | 1       | 1422 |
| “Your friends”                       | 0.80 | 0.21               | 0       | 1       | 1422 |
| “Your neighborhood”                  | 0.69 | 0.19               | 0       | 1       | 1422 |
| “People you know personally”         | 0.55 | 0.23               | 0       | 1       | 1422 |
| “People you meet for the first time” | 0.41 | 0.24               | 0       | 1       | 1422 |
| “People of another religion”         | 0.54 | 0.22               | 0       | 1       | 1422 |
| “People of another nationality”      | 0.55 | 0.21               | 0       | 1       | 1422 |
| People of another ethnicity          | 0.55 | 0.21               | 0       | 1       | 1422 |
| Immigrants                           | 0.52 | 0.23               | 0       | 1       | 1422 |

63 *Note.* The respondents were asked “I’d like to ask you how much you trust people from various groups.  
 64 Could you tell me for each whether you trust people from this group completely, somewhat, not very  
 65 much or not at all?” Answers were measured on a 4-point scale with endpoints labelled “Do not trust at  
 66 all” and “Trust completely”. All items are coded to range for 0 to 1.  
 67

68           **Big Five inventory.** To measure individual differences in Big Five traits in  
69 Study 2 we rely on the ten-item scale developed by Gosling et al. (2003). Specifically,  
70 the participants read the following: “Here are a number of personality traits that may  
71 or may not apply to you. For each pair of traits please indicate the extent to which you  
72 agree or disagree that the pair of traits applies to you.” ”I see myself as....” ”1.  
73 Extraverted, enthusiastic”, ”2. Critical, quarrelsome”, ”3. Dependable, self-  
74 disciplined”, ”4. Anxious, easily upset”, ”5. Open to new experiences, complex”, ”6.  
75 Reserved, quiet”, ”7. Sympathetic, warm”, ”8. Disorganized, careless”, ”9. Calm,  
76 emotionally stable”, ”10. Conventional, uncreative”

77           Answers were obtained in 7-point scales with endpoints labelled “Disagree  
78 strongly” and “Agree strongly”. The items were scored in the following way: Item 1  
79 and item 6 (reverse scored) were combined into the extraversion factor ( $r = 0.57$ ),  
80 item 2 (reverse scored) and item 7 were combined into the agreeableness factor ( $r =$   
81  $0.31$ ), item 3 and item 8 (reverse scored) were combined into the conscientiousness  
82 factor ( $0.46$ ), item 4 (reverse scored) and item 9 were combined into the neuroticism  
83 factor ( $r = 0.64$ ) and item 5 and item 10 (reverse scored) were combined into the  
84 openness to experience factor ( $r = 0.35$ ).

85           **Socio-demographic control variables.** In Study 2, we measured and coded  
86 the socio-demographic variables gender, age, education, family income and race in  
87 the same way as in Study 1 (see ”Supplementary measurement details for Study 1” in  
88 the Online Appendix for question wording details).

89

90

91 **A4. Supplemental analysis for Study 2**

92 **A4.1 Interaction analysis for Study 2**

93 The results in Table A3 below show the full interaction models from which the  
 94 interaction results reported in Study 2 in the main text come.

95

96 **Table A3: No moderating effect of experimental condition on the impact of**

97 **pathogen disgust sensitivity on trust (by trust measure).**

|                                             | Standard single trust item | Yamagishi & Yamagishi (1994) general trust scale | Combined trust measure |
|---------------------------------------------|----------------------------|--------------------------------------------------|------------------------|
|                                             | M1                         | M2                                               | M3                     |
| Pathogen disgust                            | -0.24***<br>(0.05)         | -0.12**<br>(0.04)                                | -0.18***<br>(0.04)     |
| “Neighborhood” condition                    | 0.02<br>(0.05)             | -0.00<br>(0.03)                                  | 0.01<br>(0.04)         |
| “Neighborhood” condition × Pathogen disgust | 0.06<br>(0.08)             | 0.04<br>(0.05)                                   | 0.05<br>(0.06)         |
| Education                                   | 0.08*<br>(0.03)            | 0.02<br>(0.02)                                   | 0.05<br>(0.02)         |
| Income                                      | 0.14***<br>(0.03)          | 0.11***<br>(0.02)                                | 0.12***<br>(0.02)      |
| Caucasian                                   | 0.09***<br>(0.02)          | 0.06***<br>(0.01)                                | 0.07***<br>(0.01)      |
| Female                                      | -0.01<br>(0.01)            | -0.01<br>(0.01)                                  | -0.01<br>(0.01)        |
| Age                                         | 0.00<br>(0.00)             | 0.00<br>(0.00)                                   | 0.00<br>(0.00)         |
| Openness                                    | -0.06<br>(0.04)            | -0.05<br>(0.03)                                  | -0.05<br>(0.03)        |
| Conscientiousness                           | -0.05<br>(0.04)            | -0.00<br>(0.03)                                  | -0.03<br>(0.03)        |
| Extraversion                                | 0.00<br>(0.03)             | 0.03<br>(0.02)                                   | 0.02<br>(0.02)         |
| Agreeableness                               | 0.22***<br>(0.04)          | 0.17***<br>(0.03)                                | 0.20***<br>(0.03)      |
| Neuroticism                                 | -0.14***<br>(0.04)         | -0.10***<br>(0.02)                               | -0.12***<br>(0.03)     |
| Constant                                    | 0.48***<br>(0.06)          | 0.54***<br>(0.04)                                | 0.51***<br>(0.05)      |
| <i>n</i>                                    | 1420                       | 1420                                             | 1420                   |
| <i>R</i> <sup>2</sup>                       | 0.154                      | 0.154                                            | 0.172                  |

98 *Note.* Entries are unstandardized OLS regression coefficients. Robust standard errors are reported in  
 99 parentheses. All variables are coded to range from 0 to 1 except for age which is measured in years. \* *p*  
 100 < 0.05, \*\* *p* < 0.01, \*\*\* *p* < 0.001.

101  
 102

103

104 **A4.2 Regression models for Figure 2 in the main text**

105 By experimental condition and trust measure the results in Table A4 show the full

106 regression models with the unstandardized OLS regression coefficients for the effects

107 of pathogen disgust sensitivity on trust that are illustrated in Figure 2 in the main text.

108 Specifically, the results in Panel A in Figure 2 in the main text are based on

109 M1-2 below. The results in Panel B in Figure 2 in the main text are based on M3-4

110 below. Finally, the results in Panel C in Figure 2 in the main text are based on 5-6

111 below.

112 **Table A4: The effect of pathogen disgust sensitivity on trust (by trust measure**  
 113 **and experimental condition)**

|                       | Standard single trust item |                   | Yamagishi & Yamagishi (1994) general trust scale |                   | Combined trust measure |                   |
|-----------------------|----------------------------|-------------------|--------------------------------------------------|-------------------|------------------------|-------------------|
|                       | “Some people”              | “Neighborhood”    | “Some people”                                    | “Neighborhood”    | “Some people”          | “Neighborhood”    |
|                       | M1                         | M2                | M3                                               | M4                | M5                     | M6                |
| Pathogen disgust      | -0.28***<br>(0.05)         | -0.14*<br>(0.06)  | -0.14***<br>(0.04)                               | -0.06<br>(0.04)   | -0.21***<br>(0.04)     | -0.10*<br>(0.05)  |
| Education             | 0.06<br>(0.04)             | 0.10*<br>(0.04)   | -0.01<br>(0.03)                                  | 0.04<br>(0.03)    | 0.03<br>(0.03)         | 0.07*<br>(0.04)   |
| Income                | 0.11**<br>(0.04)           | 0.17***<br>(0.04) | 0.09***<br>(0.03)                                | 0.12***<br>(0.03) | 0.10***<br>(0.03)      | 0.14***<br>(0.03) |
| Caucasian             | 0.03<br>(0.02)             | 0.15***<br>(0.02) | 0.02<br>(0.02)                                   | 0.09***<br>(0.02) | 0.02<br>(0.02)         | 0.12***<br>(0.02) |
| Female                | 0.03<br>(0.02)             | -0.05*<br>(0.02)  | 0.01<br>(0.01)                                   | -0.03*<br>(0.01)  | 0.02<br>(0.02)         | -0.04*<br>(0.02)  |
| Age                   | -0.00<br>(0.00)            | 0.00<br>(0.00)    | -0.00<br>(0.00)                                  | 0.00<br>(0.00)    | -0.00<br>(0.00)        | 0.00<br>(0.00)    |
| Openness              | -0.08<br>(0.05)            | -0.05<br>(0.05)   | -0.05<br>(0.04)                                  | -0.05<br>(0.03)   | -0.06<br>(0.04)        | -0.05<br>(0.04)   |
| Conscientiousness     | -0.17**<br>(0.05)          | 0.06<br>(0.05)    | -0.09*<br>(0.04)                                 | 0.09*<br>(0.04)   | -0.13**<br>(0.04)      | 0.08<br>(0.04)    |
| Extraversion          | 0.01<br>(0.04)             | 0.00<br>(0.04)    | 0.01<br>(0.03)                                   | 0.05<br>(0.03)    | 0.01<br>(0.03)         | 0.02<br>(0.03)    |
| Agreeableness         | 0.30***<br>(0.05)          | 0.13*<br>(0.06)   | 0.22***<br>(0.04)                                | 0.12**<br>(0.04)  | 0.26***<br>(0.04)      | 0.12**<br>(0.04)  |
| Neuroticism           | -0.22***<br>(0.05)         | -0.06<br>(0.05)   | -0.14***<br>(0.04)                               | -0.06<br>(0.03)   | -0.18***<br>(0.04)     | -0.06<br>(0.04)   |
| Constant              | 0.63***<br>(0.08)          | 0.35***<br>(0.08) | 0.67***<br>(0.06)                                | 0.42***<br>(0.06) | 0.65***<br>(0.07)      | 0.38***<br>(0.07) |
| <i>n</i>              | 711                        | 709               | 711                                              | 709               | 711                    | 709               |
| <i>R</i> <sup>2</sup> | 0.177                      | 0.165             | 0.147                                            | 0.203             | 0.186                  | 0.198             |

114

115

116

*Note.* Entries are unstandardized OLS regression coefficients. Robust standard errors are reported in parentheses. All variables are coded to range from 0 to 1 except for age which is measured in years. \*  $p < 0.05$ , \*\*  $p < 0.01$ , \*\*\*  $p < 0.001$ .

117 **A5. Supplemental measurement details for Study 3**

118 **Education.** In Study 3 the respondents' educational level was measured using the  
119 following categories: 1. "No high school", 2. "High school graduate", 3. "Some  
120 college", 4. "2-year", 5. "4-year", and 6. "Post-graduate". For analysis, the variable  
121 was re-scaled to range from 0 to 1, with higher values indicating higher levels of  
122 education.

123 **Income.** As our income measure we rely on family income as in Studies 1-2.  
124 Specifically, in Study 3 the respondents' family income was measured using the  
125 following response categories: "Less than \$10,000", "\$10,000 - \$19,999", "\$20,000 -  
126 \$29,999", "\$30,000 - \$39,999", "\$40,000 - \$49,999", "\$50,000 - \$59,999", "\$60,000  
127 - \$69,999", "\$70,000 - \$79,999", "\$80,000 - \$99,999", "\$100,000 - \$119,999",  
128 "\$120,000 - \$149,999", "\$150,000 - \$199,999", "\$200,000 - \$249,999", "\$250,000 -  
129 \$349,999", "\$350,000 - \$499,999", "\$500,000 or more" and "Prefer not to say".<sup>1</sup>

130 In the analysis, the response category "Prefer not to say" was excluded, and  
131 the variable was re-scaled to range from 0 to 1, with higher values indicating higher  
132 levels of income.

133 **Race.** Respondents' racial/ethnic category was measured in the following  
134 categories: "Caucasian", "black", "hispanic", "asian", "native American", "mixed",  
135 "other", and "middle Eastern". For analysis, race was coded as a dichotomized  
136 variable (labeled Caucasian) with 1 = Caucasian and 0 = racial/ethnic minority groups  
137 (including "black", "hispanic", "asian", "native American", "mixed", "other",  
138 "middle Eastern").

139

---

<sup>1</sup> In the data from YouGov, two respondents are indicated to place themselves in an income category labelled "\$150,000 or more". Because this answer cannot reliably be coded into one of the income intervals in the income scale answers from these two respondents were excluded on the income variable.

140           **Gender.** Gender was coded as a dichotomous variable labelled “female” with  
141 1 = female and 0 = male.

142           **Social conservative issue preferences.** To measure social conservative issue  
143 preferences, we use nine items developed in a Likert format to mirror the questions  
144 selected from the ANES by Treier & Hillygus (2009). Reverse coded questions are  
145 marked with “rc”. “Please indicate how much you agree or disagree with the  
146 following statements?”

- 147 1. Gay or lesbian couples, in other words homosexual couples, should be legally  
148 permitted to adopt children (rc)
- 149 2. If a company has a history of discriminating against blacks when making hiring  
150 decisions, then they should be required to have an affirmative action program that  
151 gives blacks preference in hiring (rc)
- 152 3. By law, a woman should always be able to obtain an abortion as a matter of  
153 personal choice (rc)
- 154 4. Permission from the parents should be required before a teenage girl under the age  
155 of 18 can obtain an abortion
- 156 5. Late-term abortions, sometimes called partial birth abortions, should be illegal
- 157 6. Homosexuals should be allowed to serve in the United States Armed Forces (rc)
- 158 7. The federal government should make it a lot easier for people to buy a gun than it  
159 is now
- 160 8. Persons convicted of murder should receive the death penalty
- 161 9. A woman’s place is in the home

162  
163 Answers were obtained on 7-point scales with endpoints labelled “Disagree strongly”  
164 and “Agree strongly”. Answers were summed to a highly reliable scale ( $\alpha = 0.81$ ),  
165 and re-scaled to range from 0 to 1, higher values indicating strong social issue  
166 preferences (mean = 0.43, SD = 0.21).

167           *Big-Five Inventory.* To measure individual differences in Big Five traits we  
168 relied on the 10-item scale developed by Mondak et al (2010). Specifically, the  
169 participants read the following instruction: “The following section contains pairs of  
170 words. On the scale, please tell us which word best describes you. If a word is  
171 particularly good at describing you, click on the scale next to that word. If neither  
172 word describes you, click on the scale in between both words. You can click any



173 where on the scale. The participants then placed themselves on 11-point scales with  
174 the following pairs of words at the endpoints: “An intellectual: Not an intellectual”,  
175 “Philosophical: Unreflective”, “Neat: Sloppy”, “Hard working: Lazy” “Outgoing:  
176 Shy”, “Extraverted: Introverted”, “Sympathetic: Unsympathetic”, “Kind: Unkind”,  
177 “Relaxed: Tense”, “Calm: Nervous”. Below, we report the reliability measures for the  
178 five scales:  $r_{\text{Openness}} = 0.49$ ,  $r_{\text{Conscientiousness}} = 0.47$ ,  $r_{\text{Extraversion}} = 0.69$ ,  $r_{\text{Agreeableness}} = 0.64$ ,  
179  $r_{\text{Neuroticism}} = 0.75$ .

180         **Sociosexual orientation.** To measure individual differences in sociosexual  
181 orientation, we used the 7 questions from the Sexual Orientation Inventory (Simpson  
182 & Gangestad, 1991). The 7 items include questions about sexual attitudes and overt as  
183 well as covert behavior. We used the question wording presented by Penke and  
184 Asendorpf (2008: 1114) on the basis of the Sexual Orientation Inventory – SOI  
185 (Simpson & Gangestad, 1991). Yet, we changed the wording of item 4 slightly to  
186 make the question valid also to participants who were not in a relationship at the time  
187 of the study: 1) “With how many different partners have you had sex (sexual  
188 intercourse) within the past year?” 2) “How many different partners do you foresee  
189 yourself having sex with during the next five years? (Please give a specific, realistic  
190 estimate)” 3) “With how many partners have you had sex on one and only one  
191 occasion?” 4) “How often do you fantasize about having sex with someone other than  
192 your current partner? (if you do not have a partner, then imagine how you would react  
193 if you were in a relationship)”<sup>2</sup>, 5) “Sex without love is okay”, 6) “I can imagine  
194 myself being comfortable and enjoying “casual” sex with different partners“, 7) “I  
195 would have to be closely attached to someone (both emotionally and psychologically)

---

<sup>2</sup> In the question wording presented by Penke & Asendorpf (2008: 1114), this item was worded “How often do you fantasize about having sex with someone other than your current dating partner”.

196 before I could feel comfortable and fully enjoy having sex with him or her (reverse  
197 scored).

198         Items 1-3 were asked as open-ended questions (“prefer not to answer” options  
199 were also provided). Consistent with past research (e.g. Simpson & Gangestad 1991:  
200 883; Webster & Bryan, 2007), higher values on the open-ended items were recoded to  
201 reduce problems of “low reliability of the values in the right tail of the distribution  
202 due to exaggerations, ballpark estimations, and systematic memory biases” (Penke &  
203 Asendorpf, 2008: 1116). Answers were recoded to vary between “0 partners” to “9+  
204 partners” (item 1), and “0 partners” to “15+ partners” (item 2-3). Specifically, if a  
205 respondent indicated a higher number of partners than “9” when answering item 1 or  
206 “15” when answering items 2-3, their answer was recoded to the category “9+  
207 partners” (item 1), and the category “15+ partners” (items 2-3), respectively (see  
208 Webster and Bryan (2007: 918-9) for a similar use of “9+ partners” and “15+  
209 partners” as the maximum categories in the recoding of items 1-3). When answering  
210 items 1-3 a few respondents indicated an interval of sexual partners, e.g. “2-4” or “1-  
211 2”. For those respondents we coded the higher number in the interval; e.g. “2” if the  
212 respondent indicated “1-2”. A very few respondents indicated a minimum of partners;  
213 e.g. “10 +”. For those respondents we coded the minimum number of partners in their  
214 answer; e.g. “10” if they indicated “10+”.

215         Answers to item 4 were indicated on an 8-point scale with endpoints labeled  
216 “never” and “at least once a day” (“a prefer not to answer” option was also provided).  
217 While Simpson & Gangestad (1991) originally used a 9-point scale to measure  
218 agreement with items 5-7, we used 7-point scales ranging from "strongly disagree" to  
219 "strongly agree" to ensure consistency with the other Likert items in the survey.

220 Consistent with the procedure of Simpson and Gangestad (1991: 873),  
221 answers to items 5-7 were first aggregated into an index of attitudes toward causal,  
222 uncommitted sex ( $\alpha = .76$ ). Then the index and the other four items were  
223 standardized using zscore transformations (Simpson & Gangestad, 1991: 873).  
224 “Prefer not to answer” answers were excluded. Finally, the index of attitudes toward  
225 causal sex and the other four items were summed to a reliable scale ( $\alpha = .71$ ). The  
226 scale was recoded to vary between 0 and 1 with higher values corresponding to a  
227 more unrestricted sexual strategy.

## 228 **A6. References**

- 229 Gosling, S. D., Rentfrow, P. J., and Swann, W. B. (2003). A very brief measure of the  
230 Big-Five personality domains. *J. Res. Pers.* 37 (6), 504–528
- 231 Mondak, J. J., Hibbing, M. V., Canache, D., Seligson, M. A. & Anderson, M. R.  
232 (2010): Personality and Civic Engagement: An Integrative Framework for the  
233 Study of Trait Effects on Political Behavior, *Am. Polit.l Sci. Rev.*, 104: 85-110.
- 234 Penke, L., and Asendorpf, J. B. (2008). Beyond global sociosexual orientations: a  
235 more differentiated look at sociosexual orientation and its effects on courtship  
236 and romantic relationships. *J. Pers. Soc. Psychol.* 95 (5), 1113–1135.
- 237 Simpson, J. A., and Gangestad, S. W. (1991). Individual differences in sociosexual  
238 orientation: evidence for convergent and discriminant validity. *J. Pers. Soc.*  
239 *Psychol.* 60 (6), 870–883.
- 240 Treier, S., and Hillygus, D. S. (2009). The nature of political ideology in the  
241 contemporary electorate. *Public Opin. Q.* 73 (4), 679–703.
- 242 Yamagishi, T., and Yamagishi, M. (1994). Trust and commitment in the United States  
243 and Japan. *Motiv. Emotion* 18 (2), 129–166.

244 Webster, G. D., & Bryan, A. (2007). Sociosexual attitudes and behaviors: Why two  
245 factors are better than one. *Journal of Research in Personality*, 41(4), 917-922.  
246  
247  
248
